# Supplementary material for: Changes in Oscillatory Dynamics in the Cell Cycle of Early Xenopus laevis Embryos
Source: PubMed Central journal article supplement (PMC3921120; doi:10.1371/journal.pbio.1001788), 2014-02-11
Supplement: pbio.1001788.s008.pdf [file pbio.1001788.s008.pdf]

**Table S1. Timing and Variability of the First Few Embryonic Cell Cycles, Related to Figure 1**

|                                | Cycle 1<br>(fertilization<br>to division) | Cycle 1<br>(rotation to<br>division) | Cycle 2  | Cycle 3  | Cycle 4  |
|--------------------------------|-------------------------------------------|--------------------------------------|----------|----------|----------|
| <b>Experiment 1<br/>(n=88)</b> |                                           |                                      |          |          |          |
| Mean period                    | 86.5 min                                  | 74.0 min                             | 29.2 min | 29.4 min | n.d.     |
| S.D.                           | 2.7 min                                   | 3.1 min                              | 1.3 min  | 1.1 min  | n.d.     |
| S.D./period                    | 0.031                                     | 0.042                                | 0.043    | 0.037    | n.d.     |
| <b>Experiment 2<br/>(n=71)</b> |                                           |                                      |          |          |          |
| Mean period                    | 93.4 min                                  | 80.9 min                             | 31.8 min | 29.8 min | 28.5 min |
| S.D.                           | 5.4 min                                   | 4.9 min                              | 2.3 min  | 2.3 min  | 1.7 min  |
| S.D./Period                    | 0.058                                     | 0.061                                | 0.071    | 0.076    | 0.074    |

Variability is expressed as standard deviation (S.D.) and coefficient of variation (S.D./period). Temperature in both experiments was 23°.
